# Supplementary material
Source: Springer Nature journal article supplement (https://www.springermedizin.de/resource/supplementary/12958_2010_746_MOESM2_ESM.pdf/9568388)

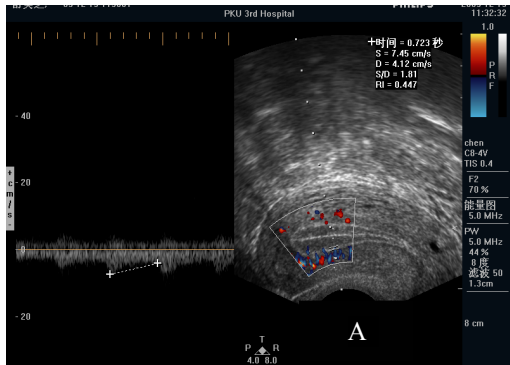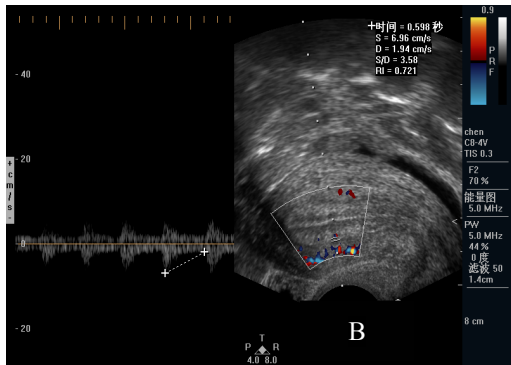

Supplement: MOESM2 [file 9568388]
